# Supplementary material for: A Systematic Analysis of Research on Arcobacter: Public Health Implications from a Food–Environment Interphase Perspective
Source: MDPI journal article supplement (doi:10.3390/foods10071673), 2021-07-20
Supplement: s1 [file s1]

**Table S1.** Growth of *Arcobacter* research across some selected foods, food products, food animals and environment.

| Position | Author Keywords     | Words                                                                                                                                                                                                                                                                                                                                                                                                                                                                                                                                                                                                                                                                               | Total | AGR  | ADY  | PDLY | h-index |
|----------|---------------------|-------------------------------------------------------------------------------------------------------------------------------------------------------------------------------------------------------------------------------------------------------------------------------------------------------------------------------------------------------------------------------------------------------------------------------------------------------------------------------------------------------------------------------------------------------------------------------------------------------------------------------------------------------------------------------------|-------|------|------|------|---------|
| 1        | <i>Arcobacter</i> * | <i>A. cryaerophilus</i> ; <i>A. butzleri</i> ; <i>A.</i> ; <i>A. spp.</i> ; <i>A. skirrowii</i> ; <i>A. Acticola</i> ; <i>A. diarrhea</i> ; <i>A. lekithochrous</i> ; <i>A. haliotis</i> ; <i>A. lacus</i> ; <i>A. caeni</i> ; <i>A. lekithochrous sp nov</i> ; <i>A. suis</i> ; <i>A. butzler</i> ; <i>A. spp</i> ; <i>A. selective agars</i> ; <i>A. detection</i> ; <i>A. faecis</i> ; <i>A. nitrofigilis</i> ; <i>A. mytili</i> ; <i>A. spp. detection</i> ; <i>A. species</i> ; <i>A. identification</i> ; <i>A.s</i> ; <i>A. sp.</i> ; <i>A. butzleri ED-1</i> ; <i>A. halophilus</i>                                                                                         | 303   | -1.3 | 25   | 24.8 | 42      |
| 2        | poultry*            | poultry meat; poultry; poultry skin; Poultry intestines; poultry processing                                                                                                                                                                                                                                                                                                                                                                                                                                                                                                                                                                                                         | 21    | 0.3  | 1    | 14.3 | 10      |
| 3        | shellfish*          | Shellfish                                                                                                                                                                                                                                                                                                                                                                                                                                                                                                                                                                                                                                                                           | 13    | 0.7  | 2.7  | 61.5 | 8       |
| 4        | cattle              | Cattle; Cow milk                                                                                                                                                                                                                                                                                                                                                                                                                                                                                                                                                                                                                                                                    | 10    | -0.3 | 0.3  | 10   | 7       |
| 5        | chicken             | broiler chickens; chicken                                                                                                                                                                                                                                                                                                                                                                                                                                                                                                                                                                                                                                                           | 10    | -0.3 | 0    | 0    | 7       |
| 6        | milk*               | Milk; milk filter                                                                                                                                                                                                                                                                                                                                                                                                                                                                                                                                                                                                                                                                   | 8     | 0    | 0.3  | 12.5 | 6       |
| 7        | water*              | water; water source; Waterborne pathogen; waterborne pathogen detection                                                                                                                                                                                                                                                                                                                                                                                                                                                                                                                                                                                                             | 8     | -0.3 | 0.7  | 25   | 6       |
| 8        | beef*               | Beef                                                                                                                                                                                                                                                                                                                                                                                                                                                                                                                                                                                                                                                                                | 6     | 0    | 0    | 0    | 5       |
| 9        | dog*                | Dogs; dog                                                                                                                                                                                                                                                                                                                                                                                                                                                                                                                                                                                                                                                                           | 6     | -0.7 | 0.7  | 33.3 | 2       |
| 10       | pork*               | pork abortion; pork chops; Pork                                                                                                                                                                                                                                                                                                                                                                                                                                                                                                                                                                                                                                                     | 6     | 0.3  | 0.7  | 33.3 | 4       |
| 11       | sheep*              | Sheep                                                                                                                                                                                                                                                                                                                                                                                                                                                                                                                                                                                                                                                                               | 5     | 0    | 0.7  | 40   | 3       |
| 12       | fish*               | Fish                                                                                                                                                                                                                                                                                                                                                                                                                                                                                                                                                                                                                                                                                | 4     | 0    | 0.3  | 25   | 3       |
| 13       | wastewater*         | wastewater; Wastewater treatment                                                                                                                                                                                                                                                                                                                                                                                                                                                                                                                                                                                                                                                    | 4     | 0    | 0.7  | 50   | 3       |
| 14       | geese               | Geese                                                                                                                                                                                                                                                                                                                                                                                                                                                                                                                                                                                                                                                                               | 3     | 0    | 0.3  | 33.3 | 2       |
| 15       | goat*               | Goats                                                                                                                                                                                                                                                                                                                                                                                                                                                                                                                                                                                                                                                                               | 3     | 0    | 0.3  | 33.3 | 2       |
| 16       | meat*               | Meat                                                                                                                                                                                                                                                                                                                                                                                                                                                                                                                                                                                                                                                                                | 3     | 0    | 0    | 0    | 3       |
| 17       | vegetable*          | Vegetables; Vegetable processing                                                                                                                                                                                                                                                                                                                                                                                                                                                                                                                                                                                                                                                    | 2     | 0    | 0.3  | 50   | 2       |
| 18       | river*              | river water                                                                                                                                                                                                                                                                                                                                                                                                                                                                                                                                                                                                                                                                         | 1     | 0.3  | 0.3  | 100  | 1       |
|          | Both Keywords       | Words                                                                                                                                                                                                                                                                                                                                                                                                                                                                                                                                                                                                                                                                               | Total | AGR  | ADY  | PDLY | h-index |
| 1        | <i>Arcobacter</i> * | <i>A. cryaerophilus</i> ; <i>A. butzleri</i> ; <i>A.</i> ; <i>A. spp.</i> ; <i>A. skirrowii</i> ; <i>A. acticola</i> ; <i>A. diarrhea</i> ; <i>A. lekithochrous</i> ; <i>A. haliotis</i> ; <i>A. lacus</i> ; <i>A. caeni</i> ; <i>A. lekithochrous sp nov</i> ; <i>A. molluscorum</i> ; <i>A. pacificus</i> ; <i>A. porcinus</i> ; <i>A. thereius</i> ; <i>A. suis</i> ; <i>A. butzler</i> ; <i>A. spp</i> ; <i>A. selective agars</i> ; <i>A. detection</i> ; <i>A. faecis</i> ; <i>A. nitrofigilis</i> ; <i>A. mytili</i> ; <i>A. spp. detection</i> ; <i>A. species</i> ; <i>A. identification</i> ; <i>A.s</i> ; <i>A. sp.</i> ; <i>A. butzleri ED-1</i> ; <i>A. halophilus</i> | 357   | -2.3 | 27.3 | 23   | 45      |

|    |             |                                                                                                                                                                                                                                                                       |    |      |     |      |    |
|----|-------------|-----------------------------------------------------------------------------------------------------------------------------------------------------------------------------------------------------------------------------------------------------------------------|----|------|-----|------|----|
| 2  | poultry*    | Poultry Products; Poultry; poultry meat; poultry skin; Poultry intestines; poultry processing                                                                                                                                                                         | 95 | 0.3  | 4   | 12.6 | 30 |
| 3  | water*      | Water; Water Treatment-Plant; Waterborne Outbreak; Water Treatment; Water Samples; Water Source; Water Pollution; Water Temperature; Waterborne Pathogen; Waters; Water Supply; Water Microbiology; Water-Quality; Waterborne Pathogen Detection; Water Contamination | 75 | -1   | 6   | 24   | 26 |
| 4  | chicken     | Broiler-Chickens;Broiler Chickens;Broiler Carcasses;Broiler Flocks;Chicken                                                                                                                                                                                            | 61 | -0.7 | 0.7 | 3.3  | 28 |
| 5  | meat*       | Meats; Meat                                                                                                                                                                                                                                                           | 25 | 0    | 1.3 | 16   | 11 |
| 6  | shellfish*  | Shellfish                                                                                                                                                                                                                                                             | 21 | 0.3  | 3.7 | 52.4 | 10 |
| 7  | cattle      | Cattle; Cow Milk                                                                                                                                                                                                                                                      | 20 | 0    | 0.7 | 10   | 11 |
| 8  | milk*       | Milk; milk filter                                                                                                                                                                                                                                                     | 13 | 0    | 1   | 23.1 | 8  |
| 9  | beef*       | Beef; Beef-Cattle; Beef Trimmings                                                                                                                                                                                                                                     | 10 | 0    | 0   | 0    | 7  |
| 10 | pork*       | pork abortion; pork; pork chops                                                                                                                                                                                                                                       | 8  | 0.3  | 1   | 37.5 | 5  |
| 11 | dog*        | Dogs; dog                                                                                                                                                                                                                                                             | 6  | -0.7 | 0.7 | 33.3 | 2  |
| 12 | fish*       | Fish                                                                                                                                                                                                                                                                  | 5  | 0    | 0.3 | 20   | 4  |
| 13 | sheep*      | Sheep                                                                                                                                                                                                                                                                 | 5  | 0    | 0.7 | 40   | 3  |
| 14 | wastewater* | wastewater; Wastewater treatment                                                                                                                                                                                                                                      | 4  | 0    | 0.7 | 50   | 3  |
| 15 | geese       | Geese                                                                                                                                                                                                                                                                 | 3  | 0    | 0.3 | 33.3 | 2  |
| 16 | goat*       | Goats                                                                                                                                                                                                                                                                 | 3  | 0    | 0.3 | 33.3 | 2  |
| 17 | river*      | River Don; River Water                                                                                                                                                                                                                                                | 2  | 0.3  | 0.3 | 50   | 1  |
| 18 | vegetable*  | Vegetables; Vegetable processing                                                                                                                                                                                                                                      | 2  | 0    | 0.3 | 50   | 2  |

AGR: Average Growth Rate, ADY: Average Documents per Year, PDLY: Percentage document per last 3 years.

**Table S2.** Country's contribution to *Arcobacter* research between 1991–2019.

| Corresponding Author's Countries |                |     |          |       |      |       |             |     |             | Total Citations per Country |      |       |
|----------------------------------|----------------|-----|----------|-------|------|-------|-------------|-----|-------------|-----------------------------|------|-------|
|                                  | Country        | PUB | Freq (%) | AGR   | PDLY | SCA   | SCA/PUB (%) | MCA | MCA/PUB (%) | Country                     | TC   | AAC   |
| 1                                | USA            | 58  | 13.33    | 1.00  | 26   | 53.00 | 91.38       | 5   | 8.62        | Belgium                     | 3737 | 86.91 |
| 2                                | Belgium        | 43  | 9.89     | −0.30 | 10.6 | 41.00 | 95.35       | 2   | 4.65        | USA                         | 2580 | 44.48 |
| 3                                | Spain          | 40  | 9.20     | −0.70 | 26.8 | 40.00 | 100.00      | 0   | 0           | Spain                       | 1566 | 39.15 |
| 4                                | Italy          | 38  | 8.74     | 0.30  | 26.2 | 38.00 | 100.00      | 0   | 0           | United Kingdom              | 1180 | 35.76 |
| 5                                | United Kingdom | 33  | 7.59     | 0.00  | 0    | 31.00 | 93.94       | 2   | 6.06        | Italy                       | 757  | 19.92 |
| 6                                | Germany        | 29  | 6.67     | −1.30 | 15.2 | 29.00 | 100.00      | 0   | 0           | Denmark                     | 591  | 65.67 |
| 7                                | Chile          | 24  | 5.52     | −0.70 | 15   | 22.00 | 91.67       | 2   | 8.33        | Canada                      | 479  | 31.93 |
| 8                                | Czech Republic | 22  | 5.06     | 0.30  | 22.7 | 22.00 | 100.00      | 0   | 0           | Germany                     | 396  | 13.66 |
| 9                                | Turkey         | 21  | 4.83     | −1.00 | 17.6 | 21.00 | 100.00      | 0   | 0           | Turkey                      | 346  | 16.48 |
| 10                               | Canada         | 15  | 3.45     | −1.30 | 13   | 14.00 | 93.33       | 1   | 6.67        | Chile                       | 314  | 13.08 |
| 11                               | India          | 11  | 2.53     | −1.00 | 27.8 | 11.00 | 100.00      | 0   | 0           | Japan                       | 269  | 26.9  |
| 12                               | Japan          | 10  | 2.30     | 1.30  | 50   | 10.00 | 100.00      | 0   | 0           | Netherlands                 | 240  | 24    |
| 13                               | Netherlands    | 10  | 2.30     | 0.30  | 7.7  | 7.00  | 70.00       | 3   | 30          | France                      | 178  | 59.33 |
| 14                               | Brazil         | 9   | 2.07     | 0.70  | 55.6 | 9.00  | 100.00      | 0   | 0           | Czech Republic              | 166  | 7.55  |
| 15                               | Denmark        | 9   | 2.07     | 0.30  | 5.6  | 9.00  | 100.00      | 0   | 0           | Austria                     | 161  | 53.67 |
| 16                               | Korea          | 9   | 2.07     | 0.00  | 12.5 | 9.00  | 100.00      | 0   | 0           | Korea                       | 155  | 17.22 |
| 17                               | Portugal       | 8   | 1.84     | 0.30  | 44.4 | 8.00  | 100.00      | 0   | 0           | India                       | 146  | 13.27 |
| 18                               | Costa Rica     | 6   | 1.38     | −0.70 | 30   | 4.00  | 66.67       | 2   | 33.33       | Portugal                    | 142  | 17.75 |
| 19                               | Malaysia       | 6   | 1.38     | 0.00  | 33.3 | 6.00  | 100.00      | 0   | 0           | Taiwan                      | 141  | 70.5  |
| 20                               | Iran           | 4   | 0.92     | −0.30 | 14.3 | 4.00  | 100.00      | 0   | 0           | Hong Kong                   | 136  | 68    |
| 21                               | Australia      | 3   | 0.69     | 0.70  | 28.6 | 3.00  | 100.00      | 0   | 0           | Australia                   | 126  | 42    |
| 22                               | Austria        | 3   | 0.69     | 0.00  | 0    | 3.00  | 100.00      | 0   | 0           | Malaysia                    | 93   | 15.5  |
| 23                               | France         | 3   | 0.69     | 0.00  | 0    | 3.00  | 100.00      | 0   | 0           | South Africa                | 88   | 44    |
| 24                               | New Zealand    | 3   | 0.69     | 0.30  | 25   | 3.00  | 100.00      | 0   | 0           | New Zealand                 | 80   | 26.67 |
| 25                               | Nigeria        | 3   | 0.69     | 0.00  | 16.7 | 3.00  | 100.00      | 0   | 0           | Iran                        | 67   | 16.75 |
| 26                               | Finland        | 2   | 0.46     | 0.00  | 0    | 2.00  | 100.00      | 0   | 0           | Costa Rica                  | 58   | 9.67  |
| 27                               | Hong Kong      | 2   | 0.46     | 0.00  | 0    | 2.00  | 100.00      | 0   | 0           | Brazil                      | 55   | 6.11  |

|    |              |   |      |      |   |      |        |   |   |             |    |      |
|----|--------------|---|------|------|---|------|--------|---|---|-------------|----|------|
| 28 | South Africa | 2 | 0.46 | 0.00 | 0 | 2.00 | 100.00 | 0 | 0 | Mexico      | 45 | 45   |
| 29 | Taiwan       | 2 | 0.46 | 0.00 | 0 | 2.00 | 100.00 | 0 | 0 | Nigeria     | 25 | 8.33 |
| 30 | China        | 1 | 0.23 | 0.00 | 0 | 1.00 | 100.00 | 0 | 0 | Finland     | 24 | 12   |
| 31 | Mexico       | 1 | 0.23 | 0.00 | 0 | 1.00 | 100.00 | 0 | 0 | Norway      | 24 | 24   |
| 32 | Norway       | 1 | 0.23 | 0.00 | 0 | 1    | 100.00 | 0 | 0 | Poland      | 17 | 17   |
| 33 | Poland       | 1 | 0.23 | 0.00 | 0 | 1    | 100.00 | 0 | 0 | Switzerland | 8  | 8    |
| 34 | Singapore    | 1 | 0.23 | 0.00 | 0 | 1    | 100.00 | 0 | 0 | Thailand    | 5  | 5    |
| 35 | Switzerland  | 1 | 0.23 | 0.00 | 0 | 1    | 100.00 | 0 | 0 | China       | 1  | 1    |
| 36 | Thailand     | 1 | 0.23 | 0.00 | 0 | 1    | 100.00 | 0 | 0 | Singapore   | 0  | 0    |

PUB: publications, Freq: frequency, TC: total citations, AGR: Average growth rate, PDLY: percentage document per last 3 years, SCA: Single Country Article, MCA: Multiple Country Article, TC: Total citations, AAC: Average Article citations.

**Table S3.** Most relevant sources (top 20) of studies on *Arcobacter* between 1991–2019.

| Rank | Sources                                                           | PUB | % Freq | h_index | TC   | SJR  | Country        | PU                                            | PDLY | PY_start |
|------|-------------------------------------------------------------------|-----|--------|---------|------|------|----------------|-----------------------------------------------|------|----------|
| 1    | Journal Of Food Protection                                        | 42  | 8.02   | 22      | 1265 | 0.61 | United States  | International Association for Food Protection | 9.8  | 1996     |
| 2    | International Journal Of Food Microbiology                        | 25  | 4.77   | 18      | 1037 | 1.38 | Netherlands    | Elsevier BV                                   | 12   | 1996     |
| 3    | Journal Of Clinical Microbiology                                  | 18  | 3.44   | 17      | 1306 | 2.31 | United States  | American Society for Microbiology             | 0    | 1992     |
| 4    | Applied And Environmental Microbiology                            | 17  | 3.24   | 15      | 1083 | 1.66 | United States  | American Society for Microbiology             | 5.9  | 2000     |
| 5    | International Journal Of Systematic And Evolutionary Microbiology | 17  | 3.24   | 13      | 709  | 0.91 | United Kingdom | Society for General Microbiology              | 37.5 | 2005     |
| 6    | Journal Of Applied Microbiology                                   | 17  | 3.24   | 12      | 651  | 0.83 | United Kingdom | Blackwell Publishing Inc.                     | 17.6 | 1997     |
| 7    | Letters In Applied Microbiology                                   | 16  | 3.05   | 13      | 695  | 0.57 | United Kingdom | Blackwell Publishing Inc.                     | 5.9  | 1996     |
| 8    | Archiv Fur Lebensmittelhygiene                                    | 11  | 2.1    | 4       | 35   |      |                |                                               | 0    | 2006     |
| 9    | Microbiology Resource Announcements                               | 11  | 2.1    | 3       | 16   |      |                |                                               | 100  | 2018     |
| 10   | Veterinary Microbiology                                           | 11  | 2.1    | 10      | 449  | 1.17 | Netherlands    | Elsevier BV                                   | 0    | 1997     |
| 11   | Food Microbiology                                                 | 10  | 1.91   | 7       | 134  | 1.4  | United States  | Elsevier Inc.                                 | 30   | 2001     |
| 12   | Foodborne Pathogens And Disease                                   | 10  | 1.91   | 6       | 106  | 0.83 | United States  | Mary Ann Liebert Inc.                         | 30   | 2010     |
| 13   | Frontiers In Microbiology                                         | 10  | 1.91   | 4       | 91   | 1.63 | Switzerland    | Frontiers Media S.A                           | 77.8 | 2014     |
| 14   | Plos One                                                          | 9   | 1.72   | 5       | 216  | 1.1  | United States  | Public Library of Science                     | 12.5 | 2007     |
| 15   | Systematic And Applied Microbiology                               | 9   | 1.72   | 9       | 406  | 1.3  | Netherlands    | Elsevier BV                                   | 0    | 1995     |
| 16   | Folia Microbiologica                                              | 8   | 1.53   | 5       | 75   | 0.5  | Netherlands    | Springer Netherlands                          | 28.6 | 2003     |

|    |                                   |   |      |   |     |      |                |                                   |      |      |
|----|-----------------------------------|---|------|---|-----|------|----------------|-----------------------------------|------|------|
| 17 | Genome Announcements              | 7 | 1.34 | 4 | 38  | 0.49 | United States  | American Society for Microbiology | 0    | 2013 |
| 18 | Brazilian Journal Of Microbiology | 6 | 1.15 | 6 | 83  | 0.74 | Brazil         | Elsevier Editora Ltda             | 0    | 2001 |
| 19 | Italian Journal Of Food Safety    | 6 | 1.15 | 2 | 13  | 0.35 | Italy          | PagePress                         | 66.7 | 2013 |
| 20 | Journal Of Medical Microbiology   | 6 | 1.15 | 5 | 293 | 0.87 | United Kingdom | Society for General Microbiology  | 25   | 2006 |

PUB: publications, Freq: frequency, TC: total citations, SJR: PU: Publishers, PDLY: percentage document per last 3 years, PY: Publication year.

**Table S4.** *Arcobacter* research data, 2020.

| S/N | Authors                    | Article Title                                                                                                                                                 | Source Title                    | CRC | TC,<br>WC | 180<br>DUC | Research Areas                                                  | Author Keywords                                                                                                                                                                                                                            |
|-----|----------------------------|---------------------------------------------------------------------------------------------------------------------------------------------------------------|---------------------------------|-----|-----------|------------|-----------------------------------------------------------------|--------------------------------------------------------------------------------------------------------------------------------------------------------------------------------------------------------------------------------------------|
| 1   | Khodamoradi et al., 2020   | The incidence and antimicrobial resistance of <i>Arcobacter</i> species in animal and poultry meat samples at slaughterhouses in Iran                         | Iranian Journal of Microbiology | 33  | 0         | 0          | Microbiology                                                    | <i>Arcobacter</i> ; Broiler chicks; Iran; Prevalence; Antimicrobial susceptibility                                                                                                                                                         |
| 2   | Jribi et al., 2020         | Occurrence and Antibiotic Resistance of <i>Arcobacter</i> Species Isolates from Poultry in Tunisia                                                            | Journal of Food Protection      | 68  | 0         | 3          | Biotechnology & Applied Microbiology; Food Science & Technology | Antimicrobial susceptibility; <i>Arcobacter butzleri</i> ; <i>Arcobacter cryaerophilus</i> ; <i>Arcobacter</i> spp; Matrix-assisted laser desorption ionization-time of flight mass spectrometry                                           |
| 3   | Silha et al., 2020         | Chemical Composition of Natural Hydrolates and Their Antimicrobial Activity on <i>Arcobacter</i> -Like Cells in Comparison with Other Microorganisms          | Molecules                       | 77  | 0         | 1          | Biochemistry & Molecular Biology; Chemistry                     | <i>Lavandula angustifolia</i> ; <i>Syzygium aromaticum</i> ; <i>Foeniculum vulgare</i> ; <i>Laurus nobilis</i> ; hydrolates; distillation; <i>Arcobacter</i> -like bacteria; antimicrobial activity; biofilm formation; gas chromatography |
| 4   | Mottola et al., 2020       | <i>Arcobacter</i> species detection in Italian composite foods                                                                                                | LWT–Food Science and Technology | 25  | 0         | 2          | Food Science & Technology                                       | Ready-to-eat composite food; Mozzarella roll; <i>Arcobacter butzleri</i> ; Virulence factors                                                                                                                                               |
| 5   | Vidal-Veuthey et al., 2020 | Antimicrobial resistance and virulence genes profiles of <i>Arcobacter butzleri</i> strains isolated from back yard chickens and retail poultry meat in Chile | Letters in Applied Microbiology | 35  | 0         | 4          | Biotechnology & Applied Microbiology; Microbiology              | <i>Arcobacter</i> ; Chile; resistance; Valdivia; virulence                                                                                                                                                                                 |

|    |                          |                                                                                                                                                                                               |                                        |    |   |    |                                                    |                                                                                                                                                 |
|----|--------------------------|-----------------------------------------------------------------------------------------------------------------------------------------------------------------------------------------------|----------------------------------------|----|---|----|----------------------------------------------------|-------------------------------------------------------------------------------------------------------------------------------------------------|
| 6  | Celik et al., 2020       | Isolation of Arcobacter spp. and identification of isolates by multiplex PCR from various domestic poultry and wild avian species                                                             | Annals of Microbiology                 | 49 | 0 | 3  | Biotechnology & Applied Microbiology; Microbiology | Arcobacter spp.; Cloacal swab; feces; Poultry; Wild bird                                                                                        |
| 7  | Niedermeyer et al., 2020 | Search for Campylobacter spp. Reveals High Prevalence and Pronounced Genetic Diversity of Arcobacter butzleri in Floodwater Samples Associated with Hurricane Florence in North Carolina, USA | Applied and Environmental Microbiology | 49 | 0 | 2  | Biotechnology & Applied Microbiology; Microbiology | Arcobacter; Arcobacter butzleri; Campylobacter; Campylobacter jejuni; floodwaters; hurricane; MLST; genotype                                    |
| 8  | Wang, KD et al., 2020    | Arcobacter Identification and Species Determination Using Raman Spectroscopy Combined with Neural Networks                                                                                    | Applied and Environmental Microbiology | 72 | 0 | 30 | Biotechnology & Applied Microbiology; Microbiology | Arcobacter; Raman spectroscopy; rapid identification; machine learning; convolutional neural network; fully connected artificial neural network |
| 9  | Rahman et al., 2020      | Improved culture enrichment broth for isolation of Arcobacter-like species from the marine environment                                                                                        | Scientific Reports                     | 76 | 0 | 4  | Science & Technology–Other Topics                  |                                                                                                                                                 |
| 10 | On et al., 2020          | A critical rebuttal of the proposed division of the genus Arcobacter into six genera using comparative genomic, phylogenetic, and phenotypic criteria                                         | Systematic and Applied Microbiology    | 44 | 1 | 1  | Biotechnology & Applied Microbiology; Microbiology | Arcobacter; Polyphasic taxonomy; Phylogenomics; Comparative genomics; Reclassification; Rebuttal                                                |
| 11 | Szydlowski et al., 2020  | Metabolic engineering of a novel strain of electrogenic bacterium Arcobacter butzleri to create a platform for single analyte detection using a microbial fuel cell                           | Enzyme and Microbial Technology        | 65 | 0 | 2  | Biotechnology & Applied Microbiology               | Biosensor; CRISPR; Electrode associated bacteria; Electron transfer; Microbial fuel cell                                                        |



|    |                         |                                                                                                                                                   |                                         |     |   |   |                                                                               |                                                                                                                                          |
|----|-------------------------|---------------------------------------------------------------------------------------------------------------------------------------------------|-----------------------------------------|-----|---|---|-------------------------------------------------------------------------------|------------------------------------------------------------------------------------------------------------------------------------------|
| 12 | Fanelli et al., 2020    | Phenotype and genomic background of <i>Arcobacter butzleri</i> strains and taxogenomic assessment of the species                                  | Food Microbiology                       | 139 | 4 | 4 | Biotechnology & Applied Microbiology; Food Science & Technology; Microbiology | <i>Arcobacter butzleri</i> ; Aliarcobacter butzleri; Lithotrophic bacteria; Vegetables; Shellfish; Antibiotic and heavy metal resistance |
| 13 | Marta et al., 2020      | Large genetic diversity of <i>Arcobacter butzleri</i> isolated from raw milk in Southern Italy                                                    | Food Microbiology                       | 68  | 2 | 0 | Biotechnology & Applied Microbiology; Food Science & Technology; Microbiology | <i>Arcobacter</i> ; Genotyping; Multi locus sequence typing (MLST); Real-time PCR; Bulk tank milk                                        |
| 14 | Salinas et al., 2020    | <i>Arcobacter butzleri</i> , a zoonotic agent in bovine milk                                                                                      | Acta Bioquímica Clínica Latinoamericana | 15  | 0 | 0 | Medical Laboratory Technology                                                 | <i>Arcobacter</i> ; Zoonosis; Milk                                                                                                       |
| 15 | Isidro et al., 2020     | Virulence and antibiotic resistance plasticity of <i>Arcobacter butzleri</i> : Insights on the genomic diversity of an emerging human pathogen    | Infection Genetics and Evolution        | 82  | 5 | 1 | Infectious Diseases                                                           | <i>Arcobacter butzleri</i> ; Genome diversity; Virulence factors; Antibiotic resistance; porA; Phase variation                           |
| 16 | Simaluiza et al., 2020  | Prevalence of zoonotic <i>Arcobacter</i> species in pigs at slaughterhouse level in Ecuador                                                       | Revista Mvz Cordoba                     | 19  | 0 | 0 | Agriculture                                                                   | Antimicrobial drug resistance; epidemiology; reservoir; zoonoses (Source: DeCS)                                                          |
| 17 | Kristensen et al., 2020 | Bacteria from the Genus <i>Arcobacter</i> Are Abundant in Effluent from Wastewater Treatment Plants                                               | Applied and Environmental Microbiology  | 64  | 3 | 6 | Biotechnology & Applied Microbiology; Microbiology                            | <i>Arcobacter</i> ; wastewater; activated sludge; full-scale wastewater treatment plants; removal efficiency                             |
| 18 | Nelapati et al., 2020   | Occurrence, virulence gene and antimicrobial susceptibility profiles of <i>Arcobacter</i> sp. isolated from catla ( <i>Catla catla</i> ) in India | Letters in Applied Microbiology         | 40  | 0 | 1 | Biotechnology & Applied Microbiology; Microbiology                            | antibiogram profile; <i>Arcobacter</i> ; freshwater fish; virulence; MDR                                                                 |

|    |                               |                                                                                                                                                                                        |                                                |    |   |   |                                                                 |                                                                                                       |
|----|-------------------------------|----------------------------------------------------------------------------------------------------------------------------------------------------------------------------------------|------------------------------------------------|----|---|---|-----------------------------------------------------------------|-------------------------------------------------------------------------------------------------------|
| 19 | Bruckner et al.,<br>2020      | Prevalence and antimicrobial susceptibility of Arcobacter species in human stool samples derived from out- and inpatients: the prospective German Arcobacter prevalence study Arcopath | Gut Pathogens                                  | 41 | 0 | 0 | Gastroenterology & Hepatology; Microbiology                     | Arcobacter; Humans; Germany; Prevalence; Antimicrobial susceptibility                                 |
| 20 | Shange et al.,<br>2020        | Prevalence of Campylobacter and Arcobacter Species in Ostriches from Oudtshoorn, South Africa                                                                                          | Journal of Food Protection                     | 41 | 0 | 0 | Biotechnology & Applied Microbiology; Food Science & Technology | Arcobacter; Campylobacter; Ostriches; Poultry; Prevalence; South Africa                               |
| 21 | Sharma et al.,<br>2020        | Molecular detection and genetic characterization of Arcobacter butzleri isolated from red-footed pet tortoises suspected for Campylobacter spp. from Grenada, West Indies              | Plos One                                       | 70 | 0 | 0 | Science & Technology–Other Topics                               |                                                                                                       |
| 22 | Carney et al.,<br>2020        | Highly heterogeneous temporal dynamics in the abundance and diversity of the emerging pathogens Arcobacter at an urban beach                                                           | Water Research                                 | 74 | 1 | 4 | Engineering; Environmental Sciences & Ecology; Water Resources  | Arcobacter; Stormwater; Pathogens; Oligotyping; Microbial ecology                                     |
| 23 | Aydin et al.,<br>2020         | Prevalence of Arcobacter and Campylobacter in beef meat samples and characterization of the recovered isolates                                                                         | Journal of Consumer Protection and Food Safety | 57 | 1 | 3 | Food Science & Technology                                       | Antibacterial susceptibility; Arcobacter spp; Beef meat; Campylobacter spp; ERIC-PCR                  |
| 24 | Cruzado-Bravo et al.,<br>2020 | Occurrence of Arcobacter spp. in Brazilian Minas frescal cheese and raw cow milk and its association with microbiological and physicochemical parameters                               | Food Control                                   | 51 | 2 | 1 | Food Science & Technology                                       | Emerging pathogen; Microbiological and physicochemical analysis; Somatic cell counts; Milk components |
| 25 | Miller et al.,<br>2020        | Complete Genome Sequencing of Four Arcobacter Species Reveals a Diverse Suite of Mobile Elements                                                                                       | Genome Biology and Evolution                   | 31 | 0 | 0 | Evolutionary Biology; Genetics & Heredity                       | Arcobacter; insertion sequences; mobile elements; horizontal gene transfer                            |

|    |                       |                                                                                                                                         |                                                                   |    |   |   |                                             |                                                                                                |
|----|-----------------------|-----------------------------------------------------------------------------------------------------------------------------------------|-------------------------------------------------------------------|----|---|---|---------------------------------------------|------------------------------------------------------------------------------------------------|
| 26 | Bruckner et al., 2020 | Characterization of Arcobacter strains isolated from human stool samples: results from the prospective German prevalence study Arcopath | Gut Pathogens                                                     | 41 | 3 | 0 | Gastroenterology & Hepatology; Microbiology | Arcobacter; Human; Cytotoxicity; Virulence genes; Genotyping                                   |
| 27 | On et al., 2020       | An emended description of Arcobacter anaerophilus Sasi Jyothsna et al. 2013: genomic and phenotypic insights                            | International Journal of Systematic and Evolutionary Microbiology | 10 | 1 | 0 | Microbiology                                | Arcobacter; Arcobacter anaerophilus; revised taxonomic description; Halarcobacter anaerophilus |

CRC: Cited Reference Count, DUC: Day Usage Count, TC: Times Cited, WC: WoS Core.
